# Supplementary material for: Molecular characterization of pyridoxine 5′-phosphate oxidase and its pathogenic forms associated with neonatal epileptic encephalopathy
Source: PubMed Central journal article supplement (PMC7424515; doi:10.1038/s41598-020-70598-7), 2020-08-12
Supplement: 41598_2020_70598_MOESM1_ESM.pdf [file 41598_2020_70598_MOESM1_ESM.pdf]

## **Supplementary information**

### **Molecular characterization of pyridoxine 5'-phosphate oxidase and its pathogenic forms associated with neonatal epileptic encephalopathy**

**Anna Barile<sup>1,2</sup>, Isabel Nogués<sup>3</sup>, Martino L. di Salvo<sup>2</sup>, Victoria Bunik<sup>4,5</sup>, Roberto Contestabile<sup>2\*</sup>, Angela Tramonti<sup>1,2\*</sup>**

#### **Content:**

Supplementary Table 1

Supplementary Figure S1

Supplementary Figure S3

Supplementary Figure S4

Supplementary Figure S5

Supplementary Figure S6

Supplementary Figure S7

Supplementary Figure S8

**Supplementary Table 1** Summary of pathogenic missense and stop codon variants found in patients affected by PNPOD and effect of PN or PLP administration

| PNPO residue        | Replacement              | Seizure onset | Effect of PN           | Effect of PLP | Clinical picture | Reference  |            |
|---------------------|--------------------------|---------------|------------------------|---------------|------------------|------------|------------|
| Asp33               | hz D33V                  | 4 weeks       | -                      | +             | mild             | [38]       |            |
|                     | hz D33V                  | 6 h           | -                      | +             | mild             | [12]       |            |
|                     | hz D33V                  | 4 weeks       | Taken during pregnancy | +             | mild             | [39]       |            |
|                     | hz D33V                  | 3 weeks       | -                      | +             | seizures         | mild       | [12]       |
| Asp33 Glu120        | Heterozygote D33V+ E120K | 2 months      | +                      | Not used      | mild             | [12]       |            |
| Asp33 Arg116 Arg225 | D33V; R116Q; R225C       | 2 weeks       | +                      | Not used      | mild             | [12]       |            |
| Arg95               | hzR95H                   | Not reported  | +/-                    | Not used      | death            | [17]       |            |
|                     | R95C (?)                 | at birth      | Not used               | Not used      | death            | (siblings) |            |
|                     | hzR95C                   | at birth      | -                      | +             | severe           | [40]       |            |
|                     | hzR95C                   | 15 min        | -                      | Not used      | death            | (siblings) |            |
|                     | R95C (?)                 | 48 h          | -                      | +/-           | severe           | (siblings) |            |
|                     | hzR95C                   | Few min       | -                      | Not used      | death            | [40, 41]   |            |
| Arg116              | hzR95C                   | 2 h           | Not used               | +             | mild             | [12]       |            |
|                     | hzR116Q                  | 5 months      | Not used               | +             | mild             | [12]       |            |
|                     | hzR116Q                  | 3 h           | +                      | Not used      | mild             | [12]       |            |
|                     | hzR116Q                  | 20 months     | +                      | Not used      | mild             | [19]       |            |
|                     | hzR116Q                  | 3 years       | +                      | Not used      | mild             | [19]       |            |
|                     | hzR116Q                  | 8 months      | +                      | Not used      | mild             | [19]       |            |
| Glu50 Arg116        | Heterozygous E50K+R116Q  | 40 days       | +                      | Not used      | mild             | [42]       |            |
| Gly118              | hzG118R                  | 12 h          | +                      | +             | mild             | [24]       |            |
| Arg141              | hzR141C+ A94_L97del      | 6 days        | +                      | Not used      | mild             | [21]       |            |
| Arg161              | hzR161C                  | 2 days        | +                      | Not used      | mild             | [43]       |            |
| Gln174              | hzQ174X                  | at birth      | -                      | +/-           | death            | [18]       |            |
| Pro213              | hzP213S                  | 90 min        | Not used               | +             | mild             | (siblings) |            |
|                     | hzP213S                  | 10 months     | Taken during pregnancy | +             | normal           | [12, 39]   |            |
| His225              | hzR225H                  | 1 day         | +                      | +             | seizures         | severe     | [23]       |
|                     | hzR225H                  | 1 day         | +                      | +             | +                | +          |            |
|                     | hzR225H                  | 3 days        | +                      | Not used      | Not used         | severe     | [21], [12] |
|                     | hzR225H                  | 1 day         | +                      | Not used      | Not used         | severe     | (siblings) |
|                     | hzR225H                  | 1 day         | +                      | Not used      | Not used         | mild       | [21]       |
|                     | hzR225H                  | 1 day         | +                      | Not used      | Not used         | mild       | [21]       |
|                     | hzR225H                  | 2h            | -/+                    | Not used      | Not used         | death      | [44]       |
|                     | hzR225H                  | 7 days        | +                      | Not used      | Not used         | mild       | (siblings) |
|                     | hzR225H                  | 2.5 months    | +                      | Not used      | Not used         | mild       | [22]       |
|                     | hzR225H                  | 1 h           | +                      | Not used      | Not used         | mild       | [45]       |
|                     | hzR225C                  | 10 h          | -                      | +             | +                | mild       | [30]       |
|                     | hzR225L                  | Not reported  | Not used               | Not used      | +                | un         | (siblings) |
|                     | hzR225L                  | Not reported  | Not used               | Not used      | +                | un         | [31]       |
|                     | hzR225L                  | Not reported  | Not used               | Not used      | +                | un         | [31]       |
| hzR225L             | Not reported             | Not used      | Not used               | +             | un               | [31]       |            |
| Arg225              | hzR225H+R116Q            | 30 min        | +                      | Seizures      | severe           | [12]       |            |
|                     | R225H+R116Q (?)          | 25 min        | -                      | Not used      | death            | [12]       |            |
| Arg116              | hz R225H+R116Q           | 10 h          | +                      | Seizures      | Severe           | [21]       |            |
|                     | R225H+R116Q (?)          | Not reported  | -                      | Not used      | death            | (siblings) |            |
|                     | hz R225H+R116Q           | 3h            | -/+                    | Seizures      | severe           | [21]       |            |
|                     | hz R225H+R116Q           | 2 day         | +                      | Not used      | mild             | [21]       |            |
|                     | hz R225H+R116Q           | 3 h           | +                      | Not used      | mild             | [21]       |            |
| Arg229              | hzR229W (?)              | at birth      | Not used               | Not used      | death            | [13]       |            |
|                     | hzR229W (?)              | at birth      | Not used               | Not used      | death            | (siblings) |            |
|                     | hzR229W ?                | at birth      | +/-                    | Not used      | death            | [13]       |            |
|                     | hzR229W ?                | at birth      | +/-                    | Not used      | death            | [13]       |            |
|                     | hzR229Q                  | 3 h           | -                      | +             | mild             | [31]       |            |
| Stop                | hzR229Q                  | 1 day         | Not used               | +             | mild             | [23]       |            |
|                     | hz X262Q                 | 30 min        | -                      | Not used      | death            | (siblings) |            |
|                     | hz X262Q                 | 30 min        | -                      | Not used      | death            | [13]       |            |

In the “replacement” column, hz indicates homozygous. The question mark indicates that the replacement was inferred from family history. In the “effect” columns, + indicates that the administration of treatment lead to a decrease in seizure frequency or a cessation of seizures, whereas – indicates that the treatment has no effect, resulting in a recurrence of seizures.

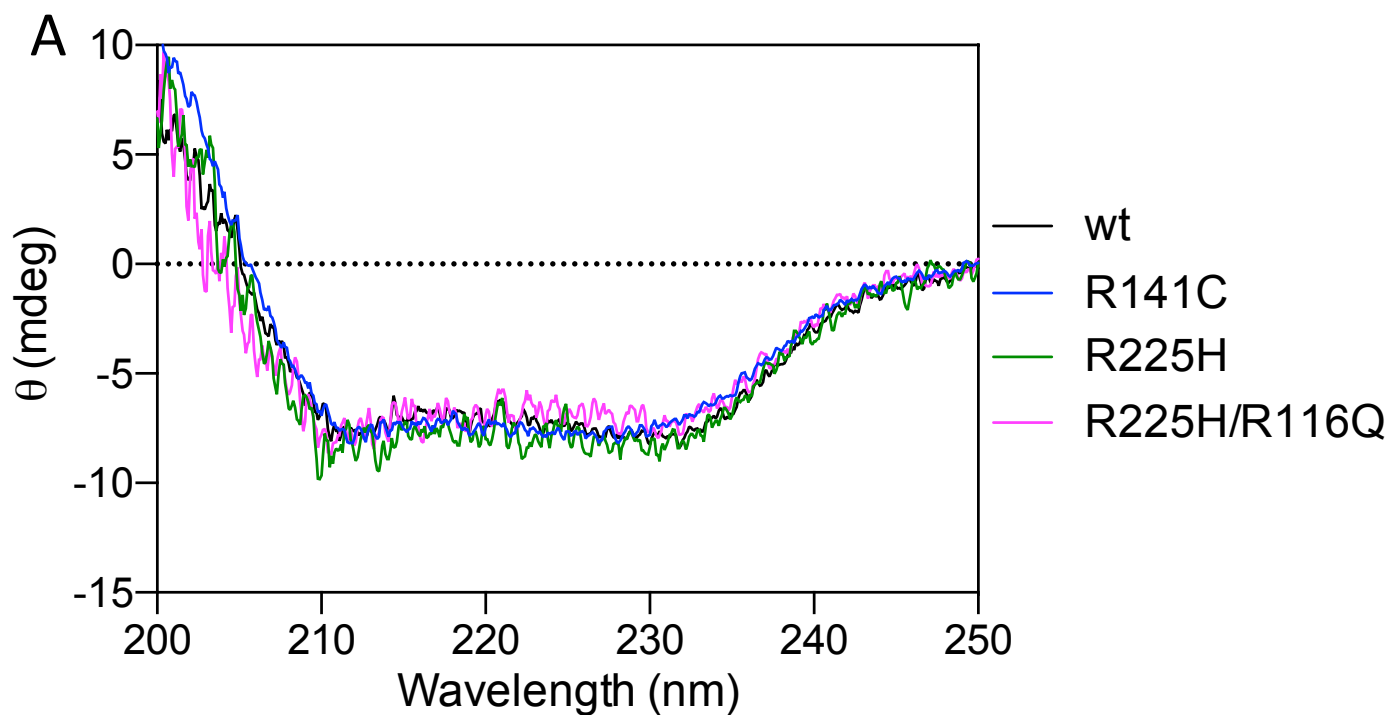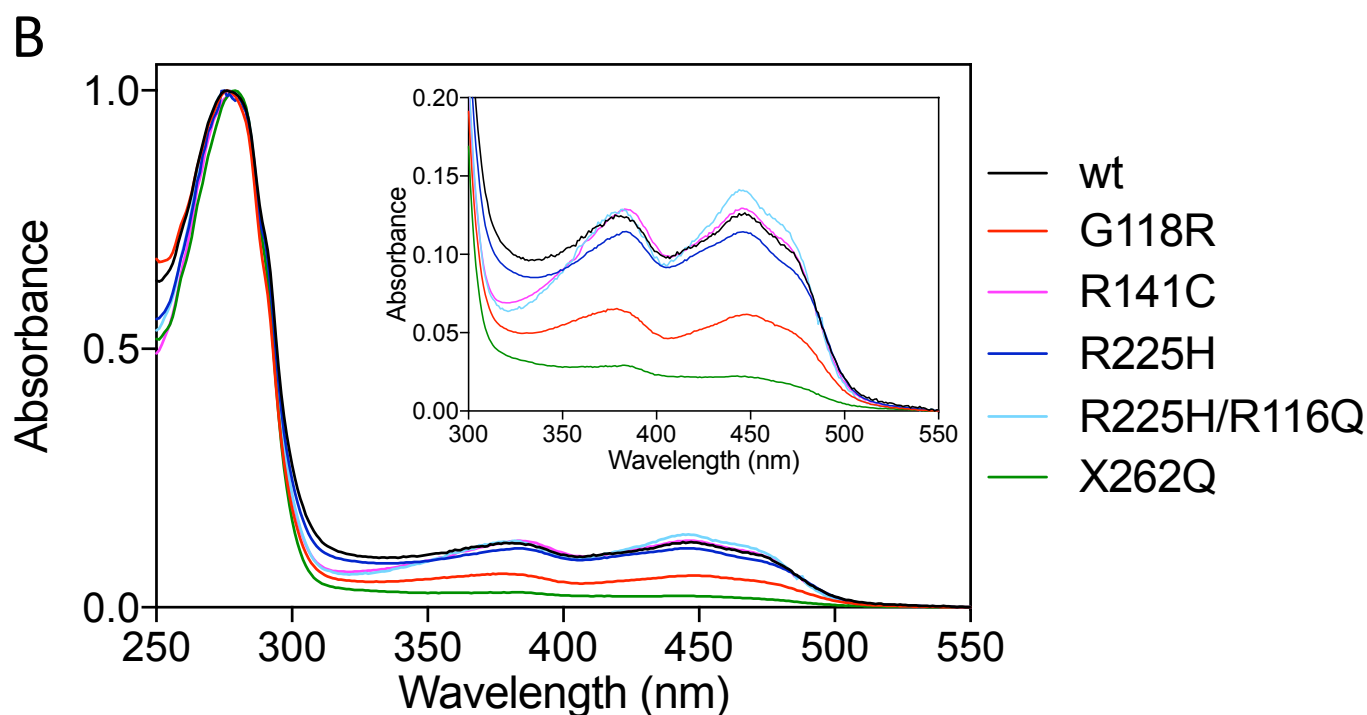

**Supplementary Figure S1: Far-UV CD (A) and absorption (B) spectra of the indicated PNPO variants.** Inset in panel B is an expanded view of the visible region of the same absorption spectra, showing absorption bands due to FMN. For each protein sample three independent preparations were analysed, although in the figure wild type, G118R, R141C, R225H, R116Q/R225H, and X262Q, with FMN saturation of 71%, 30%, 74%, 64%, 84% and 10%, respectively, were represented. All spectra were measured in 20 mM potassium-phosphate buffer, pH 7.6. Images were generated using the software Prism 8 (GraphPad; <https://www.graphpad.com/scientific-software/prism/>).

**G118R**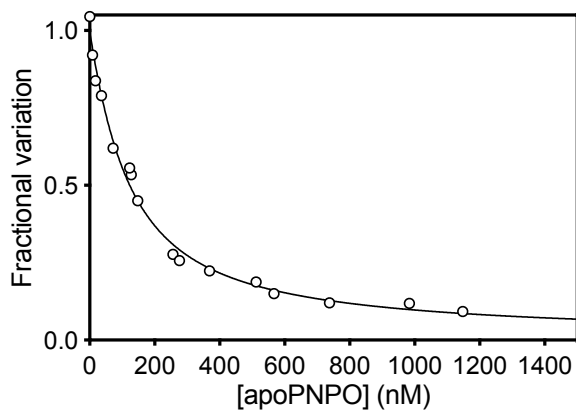**R141C**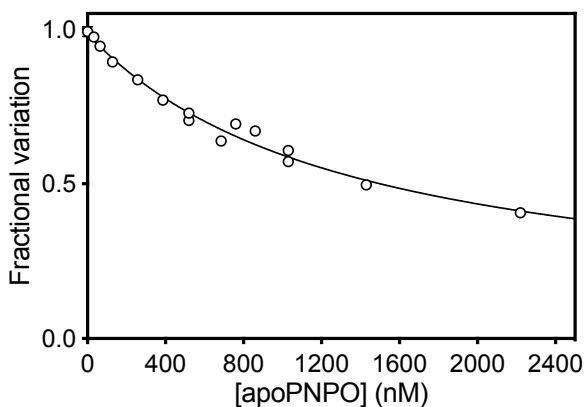**X262Q**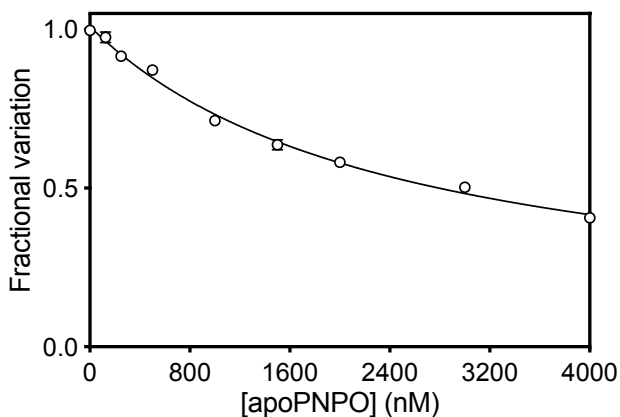

**Supplementary Figure S2: FMN binding to selected apo-PNPO variants.** The figure shows the saturation curves of FMN binding obtained with the PNPO variants that showed the highest  $K_D$  values. Data were analysed as explained in the Methods section. Images were generated using the software Prism 8 (GraphPad; <https://www.graphpad.com/scientific-software/prism/>).

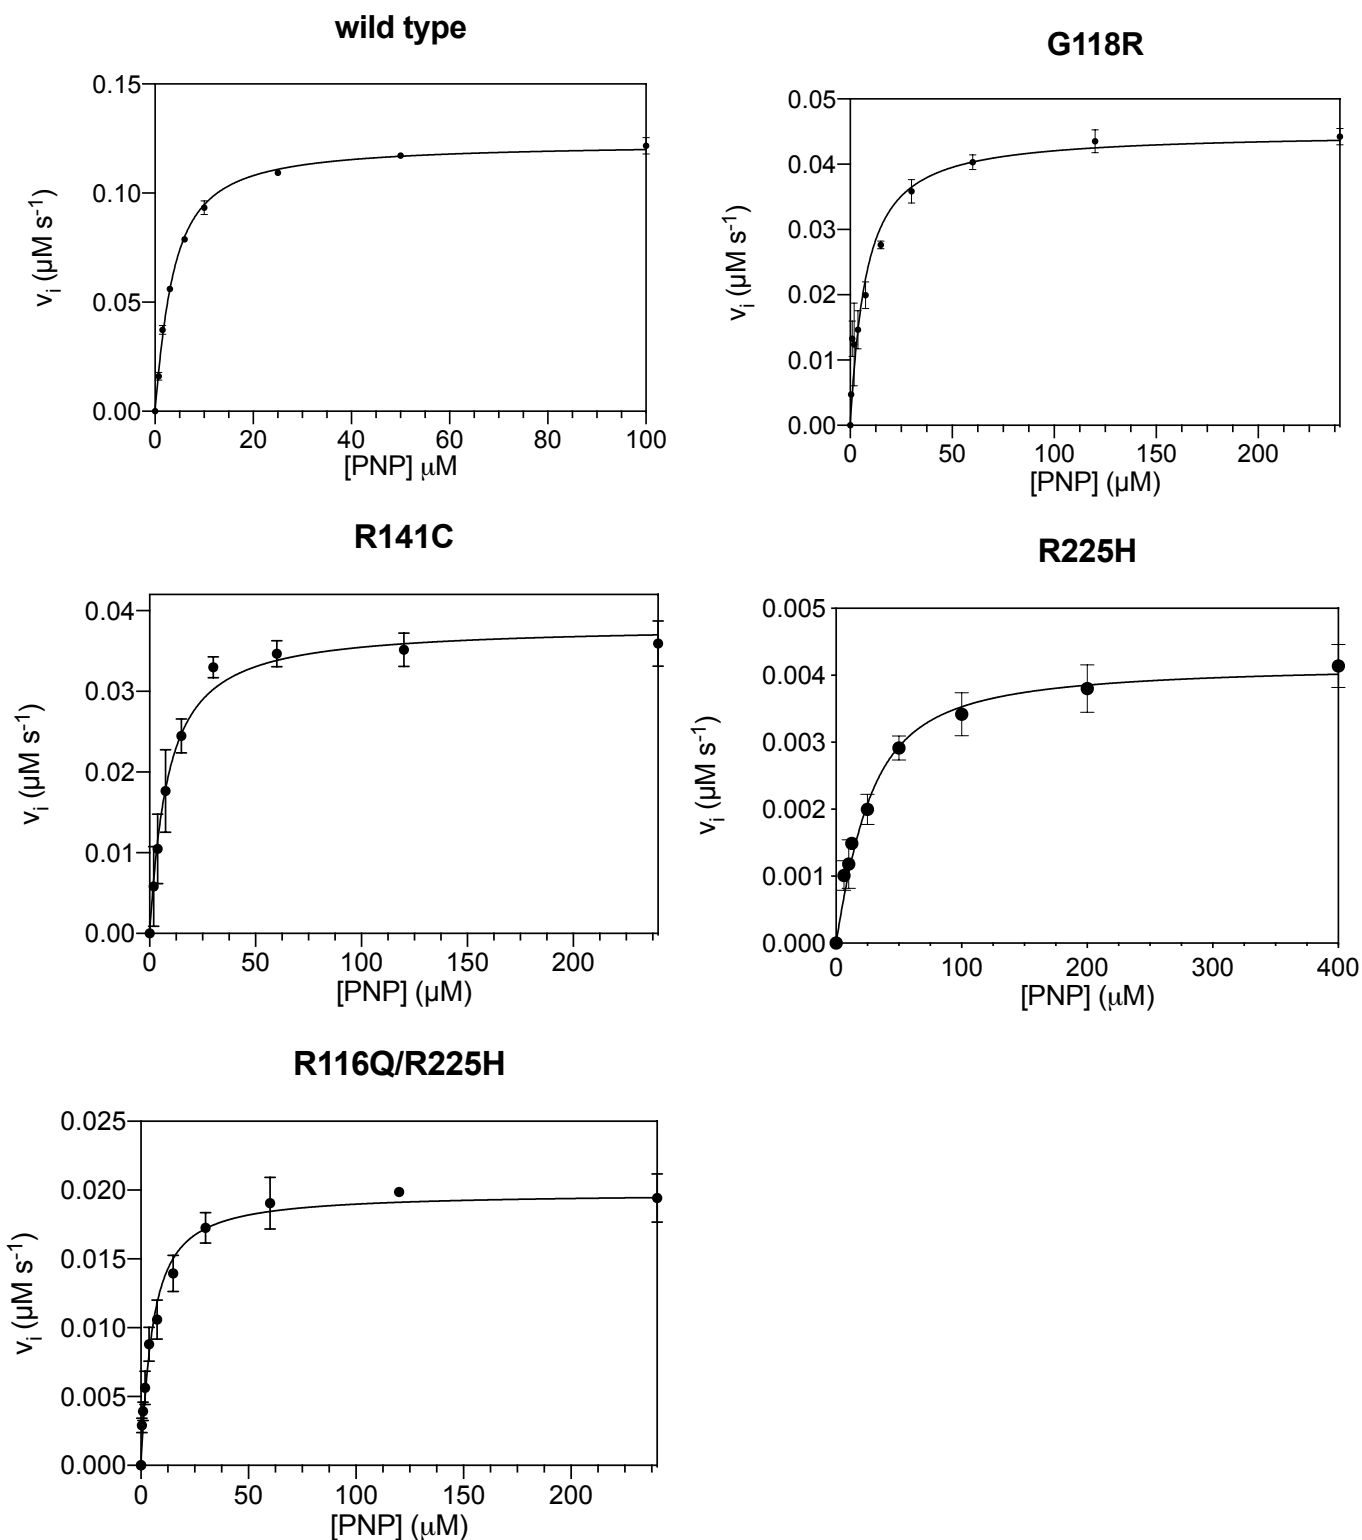

**Supplementary Figure S3: Saturation curves obtained with PNPO variants in TRIS buffer.** Initial velocity of the reaction catalysed by the wild type and the indicated PNPO variants (2  $\mu\text{M}$ ) as a function of substrate concentration. These saturation curves were analysed using the quadratic equation (2), obtaining the kinetic parameters listed in the Table 1. Images were generated using the software Prism 8 (GraphPad; <https://www.graphpad.com/scientific-software/prism/>).

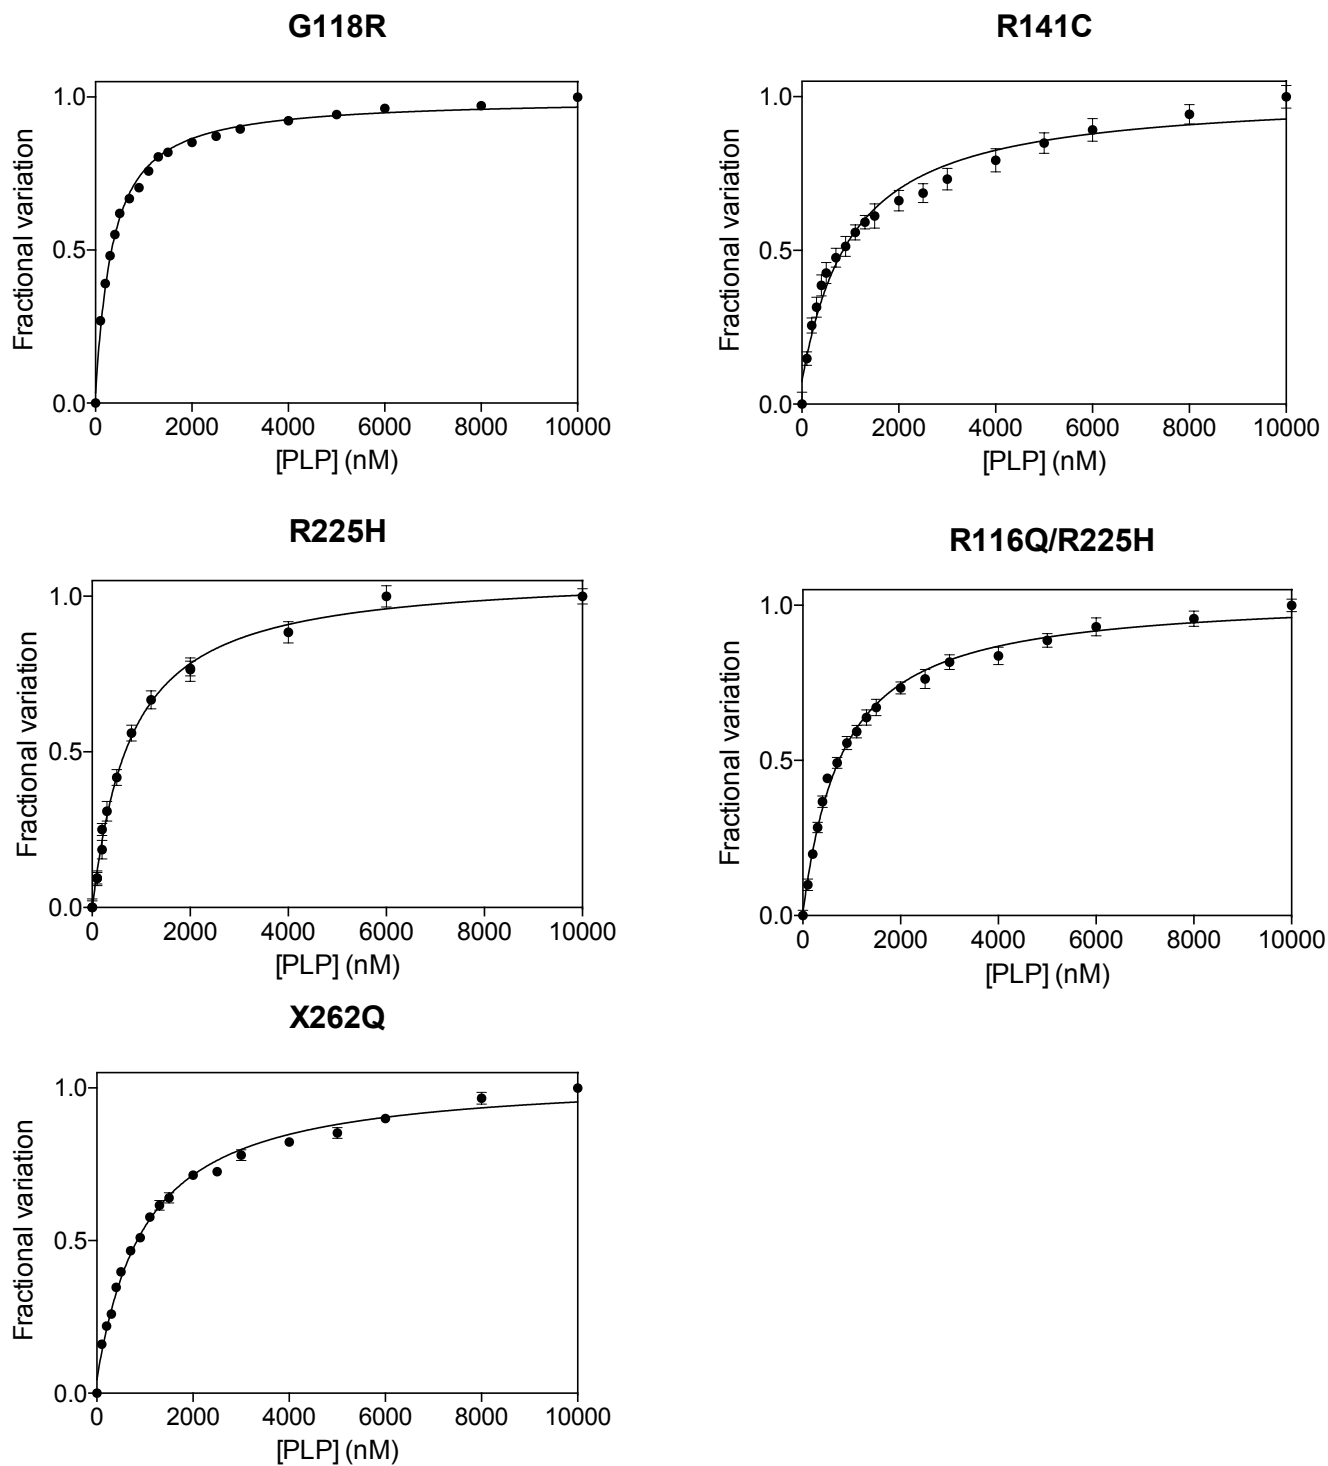

**Supplementary Figure S4: Analysis of PLP binding equilibrium of PNPO variants.** PLP binding curves obtained with 100 nM PNPO variants. Reported data are the average  $\pm$  standard deviation of three independent measurements. Data were fitted to equation (3) and the resulting  $K_I$  values were reported in Table 1. Images were generated using the software Prism 8 (GraphPad; <https://www.graphpad.com/scientific-software/prism/>).

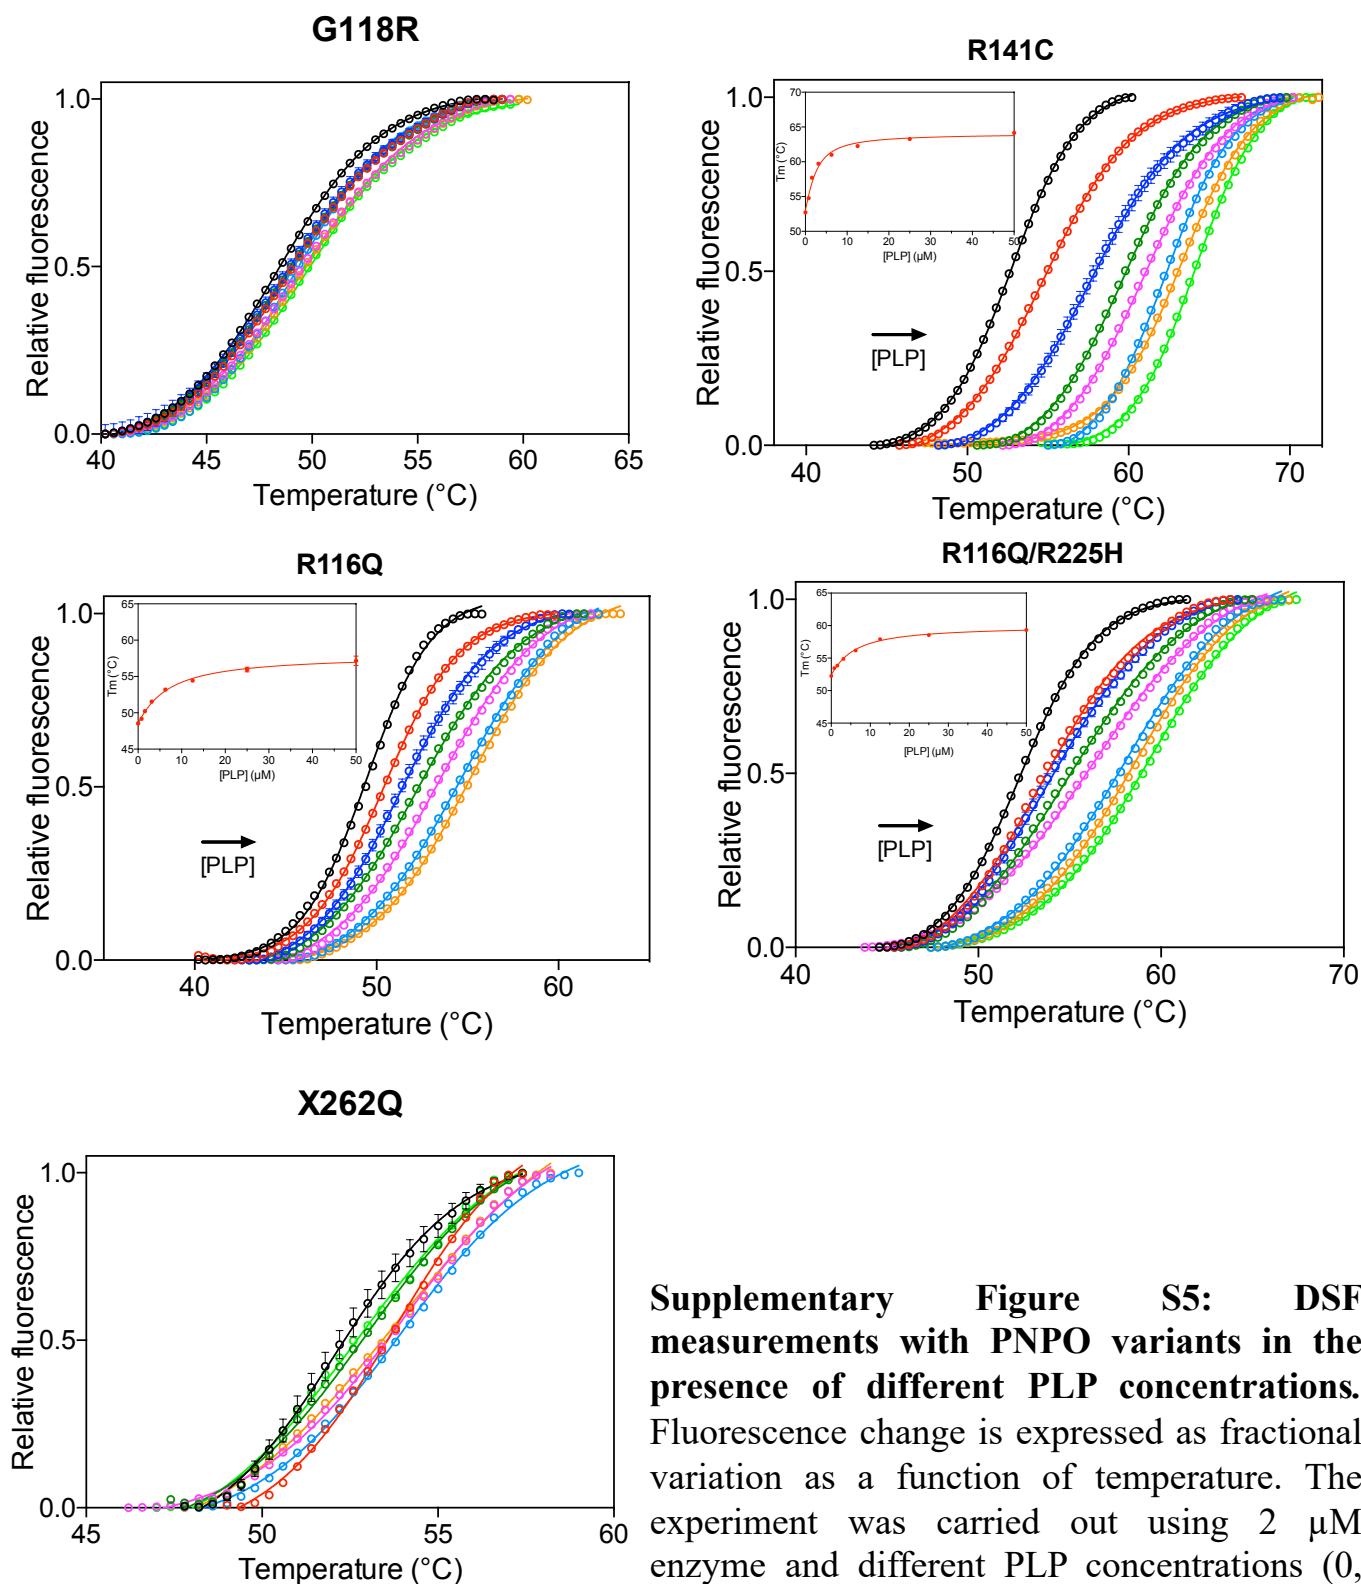

**Supplementary Figure S5: DSF measurements with PNPO variants in the presence of different PLP concentrations.** Fluorescence change is expressed as fractional variation as a function of temperature. The experiment was carried out using 2  $\mu\text{M}$  enzyme and different PLP concentrations (0, 0.78, 1.56, 3.13, 6.25, 12.5, 25 and 50  $\mu\text{M}$ ).

Thermal denaturation data were fitted to the Boltzmann equation to obtain melting temperatures. Each curve is the average of three independent experiments. In the insets, the saturation curves obtained by plotting the melting temperatures as a function of the PLP concentrations. Data were analysed using the quadratic equation (4) to estimate the dissociation constant reported in Table 1. Images were generated using the software Prism 8 (GraphPad; <https://www.graphpad.com/scientific-software/prism/>).

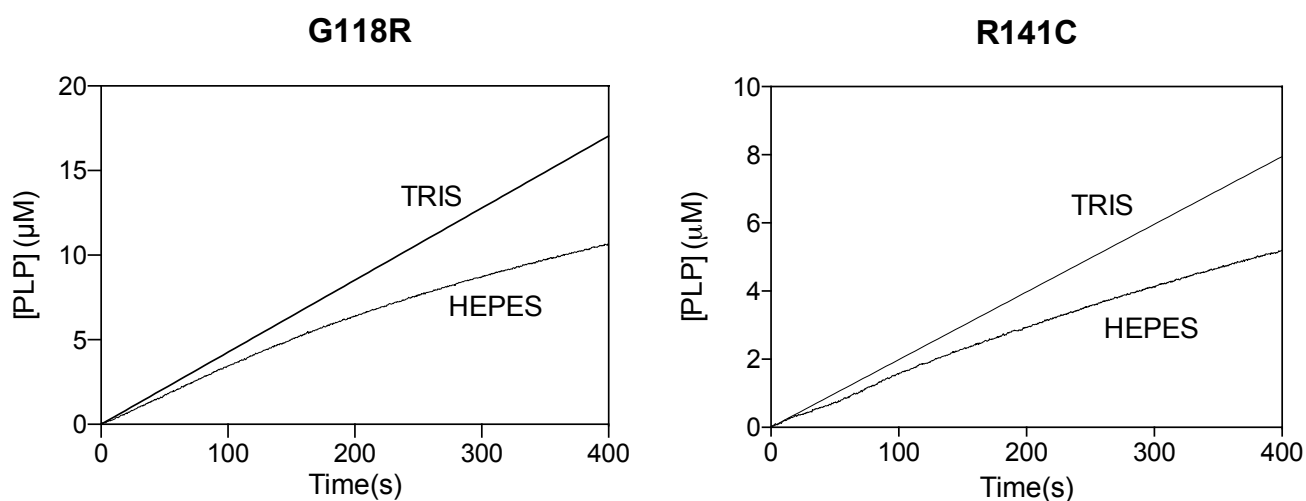

**Supplementary Figure S6: Kinetics of PNP oxidation to PLP in TRIS and HEPES buffers** Comparison of kinetics carried out in 50 mM TRIS-HCl and 50 mM Na-HEPES buffers at pH 7.6, obtained using 1  $\mu\text{M}$  PNPO variants and 100  $\mu\text{M}$  PNP. Images were generated using the software Prism 8 (GraphPad; <https://www.graphpad.com/scientific-software/prism/>).





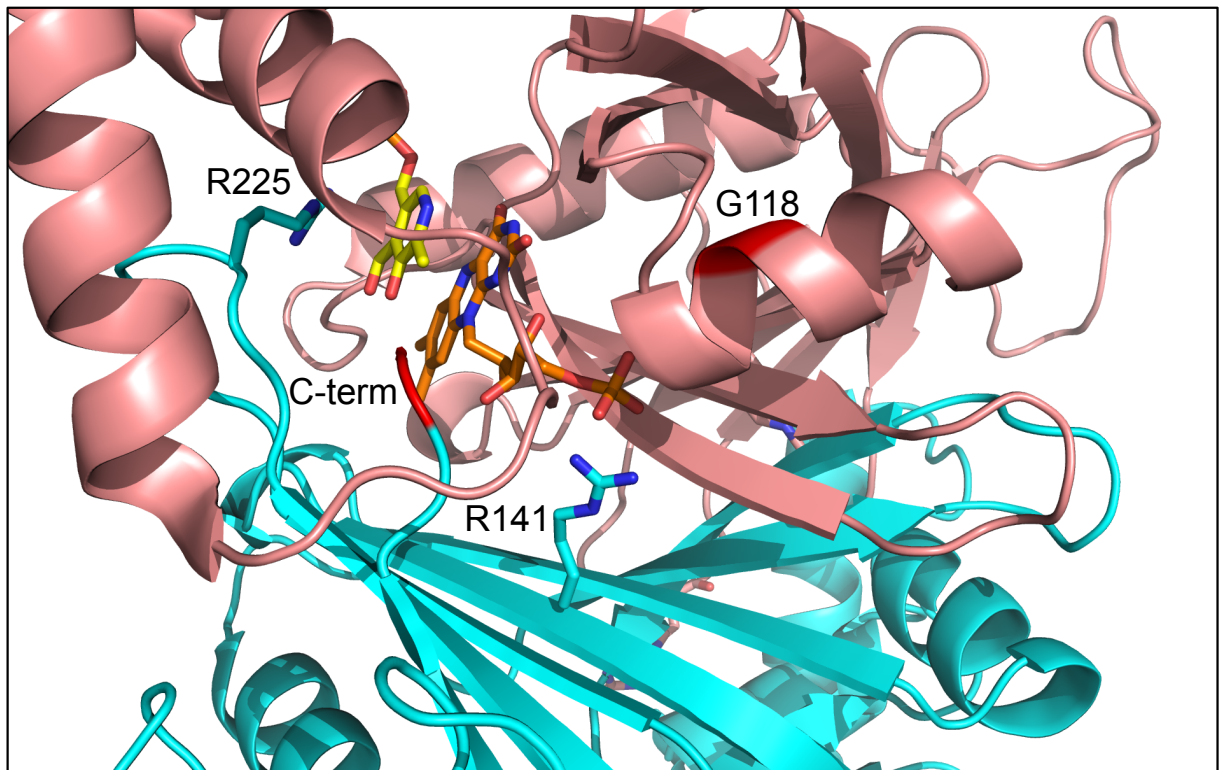

**Supplementary Figure S8: Close-up view of the active site of human PNPO** (PDB: 1NRG), showing the mutated residues studied in our investigation as sticks. The two subunits of the human PNPO dimer are shown in cyan and magenta colour, respectively. FMN and PLP in the active site are shown as sticks, in orange and yellow colour, respectively. The R141 residue interacts with the phosphate group of FMN. The G118 residue, which is a part of the  $\alpha$ 2-helix, is shown in red. The N-terminal part of this helix electrostatically interacts with the phosphate group of FMN. Moreover, the position of the C-terminal end of the protein, pointing towards the active site, is shown. The image was created using PyMOL v1.7.4.5 Edu Enhanced (<https://pymol.org/2/>).
